# Supplementary material for: Enhancing Airtight Storage with Germinating Cowpea Seeds: Impacts on Insect Mortality, Progeny and Grain Quality
Source: MDPI journal article supplement (doi:10.3390/insects14120954), 2023-12-15
Supplement: s1 [file s1]

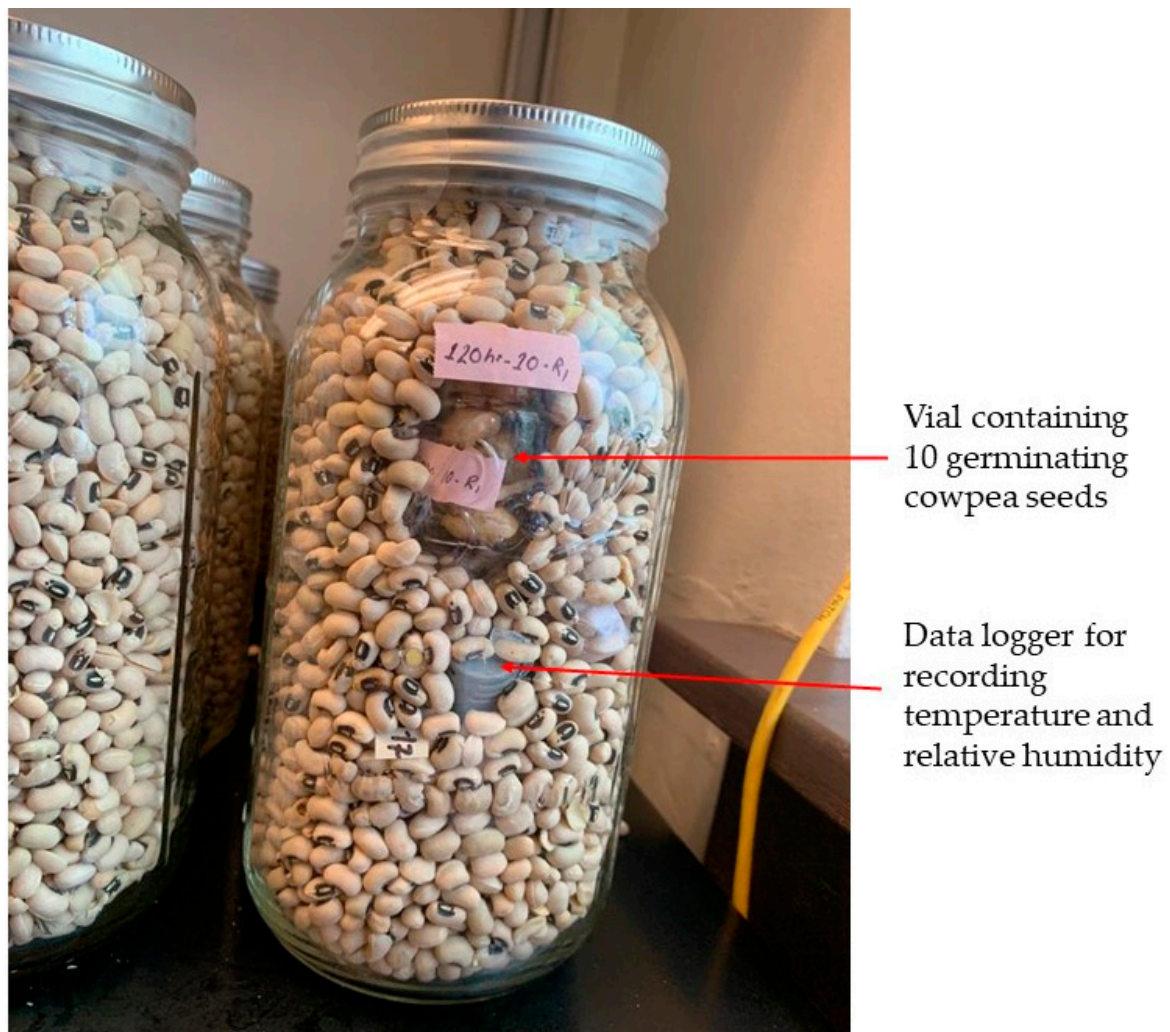

**Figure S1.** Cowpea stored in 2 L hermetic jar containing 30 mL vials (with germinating seeds or insects) and a data logger.
